# Supplementary material for: Vemurafenib enhances MHC induction in BRAFV600E homozygous melanoma cells
Source: PubMed Central journal article supplement — Oncoimmunology. 2013 Jan 1;2(1):e22890. doi: 10.4161/onci.22890 (PMC3583938; doi:10.4161/onci.22890), 2013-01-01
Supplement: onci-2-e22890-s01.pdf [file onci-2-e22890-s01.pdf]

## **Supplemental Material to:**

**Bishu Sapkota, Charles E. Hill, and Brian P. Pollack**

**Vemurafenib enhances MHC induction in *BRAF*<sup>V600E</sup>  
homozygous melanoma cells**

**Oncoimmunology 2012; 2(1)**

**<http://dx.doi.org/10.4161/onci.22890>**

**[http://www.landesbioscience.com/journals/oncoimmunology/  
article/22890/](http://www.landesbioscience.com/journals/oncoimmunology/article/22890/)**

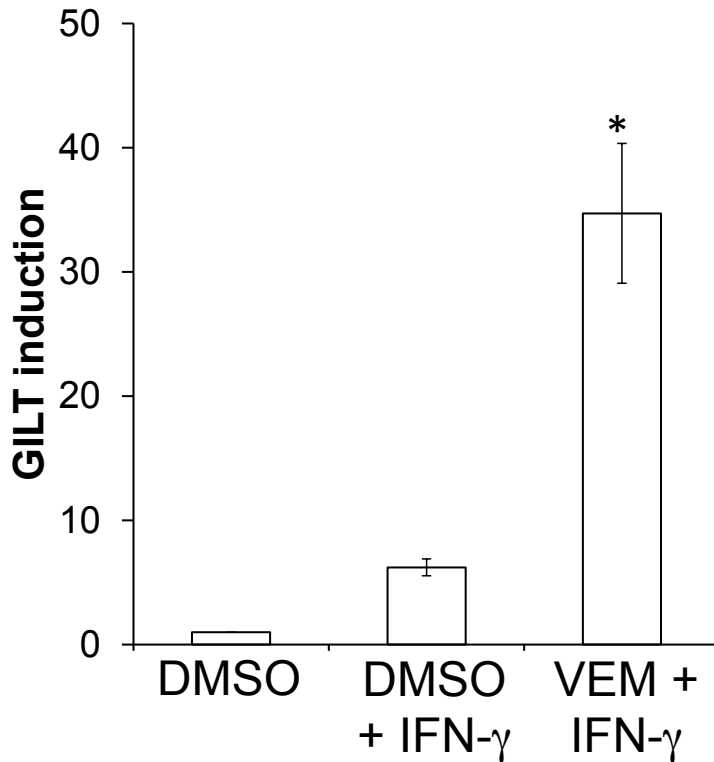

**Supplementary Figure S1. The induction of gamma-interferon-inducible lysosomal thiol reductase (GILT) mRNA is enhanced by vemurafenib.** A375 cells were pre-treated with vehicle (DMSO) or vemurafenib (VEM, 10  $\mu$ M) for 60 minutes prior to the addition of IFN- $\gamma$  (2000 U/ml). Steady state mRNA levels of GILT were analyzed 72 hours after the addition of IFN- $\gamma$  using quantitative real-time RT-PCR and are expressed relative to cells treated with DMSO. The y-axis represents the average GIFT fold induction of four independent experiments. (\*,  $p < 0.05$  paired Student's t test, as compared to cells pre-treated with DMSO and treated with IFN- $\gamma$ )

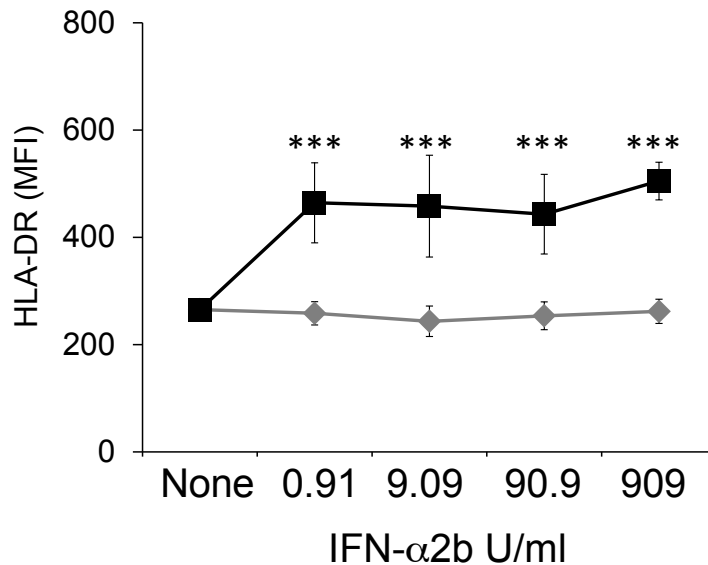

**Supplementary Figure S2. Vemurafenib enhances MHC class II induction by IFN-α2b in A375 cells.** A375 cells were left untreated (none) or pre-treated with vehicle (DMSO, gray diamonds) or vemurafenib (0.5 μM, black squares) for 60 minutes prior to the addition of IFN-α2b at the concentrations indicated along the x-axis. Cell surface MHC class II (HLA-DR) expression was measured using flow cytometry 72 hours following the addition of IFN-α2b. The y-axis represents the average mean fluorescence intensity (MFI) from 5 experiments. The error bars represent the standard deviation. (\*\*\*, p<0.001, repeated measures ANOVA, as compared to cells treated with the same concentration of IFN-α2b and DMSO)

## Supplementary Table T1. Summary of cell lines used.

| Cell line | Source | Catalogue Number | BRAF Status           |
|-----------|--------|------------------|-----------------------|
| A375      | ATCC   | CRL-1619         | V600E<br>Homozygous   |
| HT-144    | ATCC   | HTB-63           | V600E<br>Homozygous   |
| MALME-3M  | ATCC   | HTB-65           | V600E<br>Heterozygous |
| MeWo      | ATCC   | HTB-64           | Wild type             |
| SK-MEL2   | ATCC   | HTB-68           | Wild type             |
| SK-MEL3   | ATCC   | HTB-69           | V600E<br>Heterozygous |
| SK-MEL5   | ATCC   | HTB-70           | V600E<br>Heterozygous |
| SK-MEL28  | ATCC   | HTB-72           | V600E<br>Homozygous   |
| UACC-62   | NCI    |                  | V600E<br>Homozygous   |

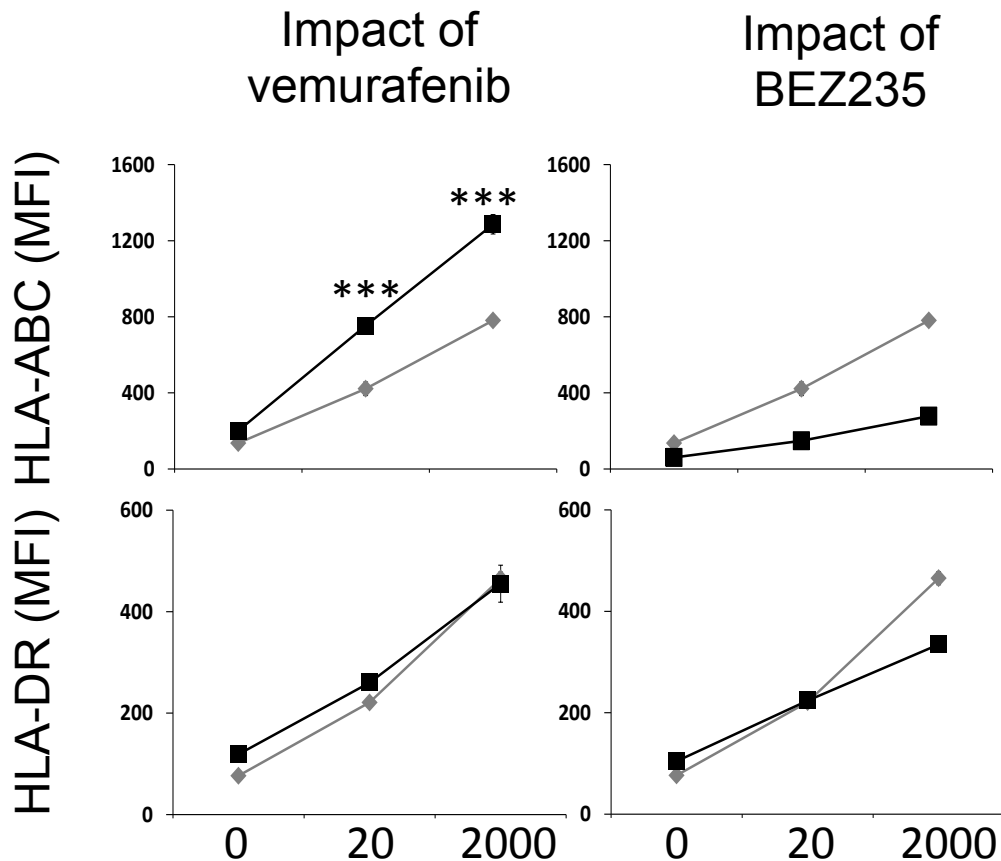

**Supplementary Figure S3. Impact of vemurafenib and BEZ235 on MHC induction in BRAF<sup>V600E</sup> homozygous UACC-62 cells.** *Left panels*, UACC-62 cells were pre-treated with vehicle (DMSO, gray diamonds) or vemurafenib (VEM, 0.5  $\mu$ M, black squares) for 60 minutes prior to the addition of IFN- $\gamma$  at the doses indicated along the x-axis. Averaged mean fluorescence intensity (MFI) values from three experiments are shown for MHC class I (top panel) and class II (bottom panels) as measured using flow cytometry 72 hours after IFN- $\gamma$  treatment. (\*\*\*,  $p < 0.001$ , ANOVA, as compared to cells pre-treated with DMSO) *Right panels*, a comparison between DMSO pre-treated cells (gray diamonds) and BEZ235-pre-treated cells (black squares) is shown.

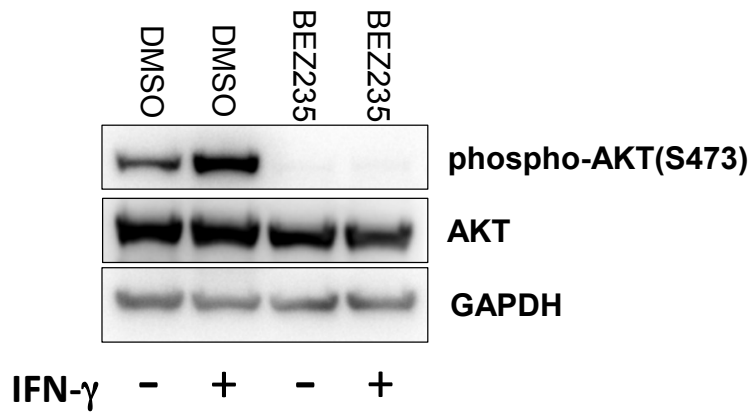

**Supplementary Figure S4. The dual PI3K/mTOR inhibitor BEZ235 decreases levels of phospho-AKT.** A375 cells were treated with vehicle (DMSO) or BEZ235 (0.5  $\mu$ M) alone of 60 minutes prior to the addition of IFN- $\gamma$  (2000 U/ml). Cell lysates were prepared 72 hours after the addition of IFN- $\gamma$  and levels of phospho-AKT (serine 473), AKT, and GAPDH visualized via western blot.

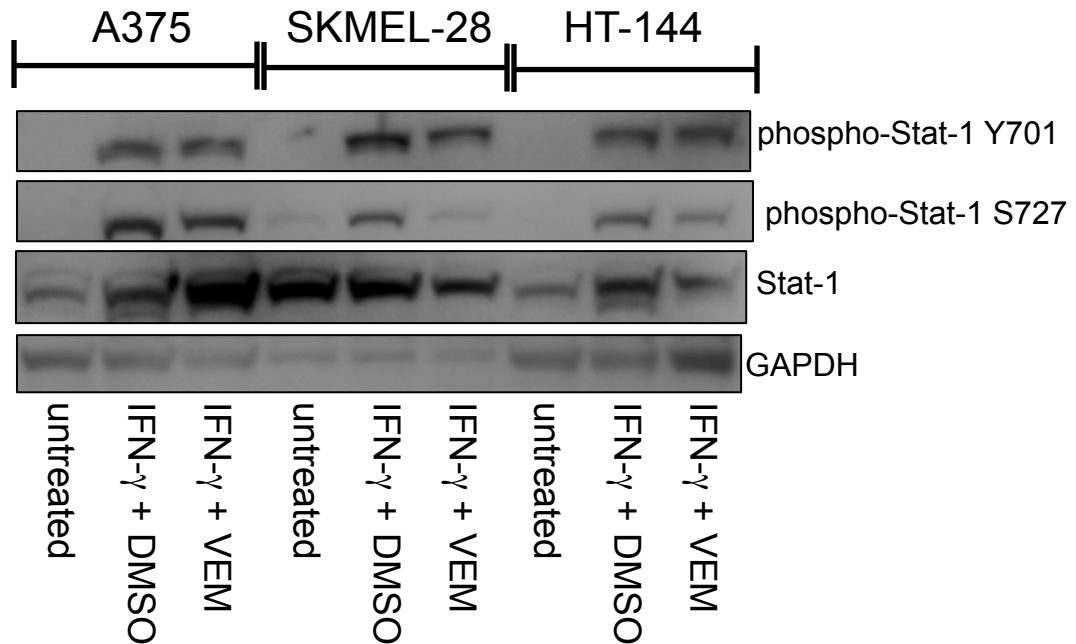

**Supplementary Figure S5. The impact of vemurafenib on Stat1 phosphorylation.** A375, SKMEL-28, and HT-144 cells were left untreated or received vehicle (DMSO) or vemurafenib (VEM, 0.5  $\mu$ M) 60 minutes prior to the addition of IFN- $\gamma$  (2000 U/ml). Whole cell lysates were prepared 24 hours after the addition of IFN- $\gamma$  and levels phospho-Stat1 (at tyrosine 701 and serine 727) assessed by western blot. Levels of Stat1 and GAPDH are also shown.
